# Supplementary material for: Gender-Affirming Hormone Treatment and Metabolic Syndrome Among Transgender Veterans
Source: PubMed Central journal article supplement (PMC11220566; doi:10.1001/jamanetworkopen.2024.19696), 2024-07-02
Supplement: jamanetwopen-e2419696-s002.pdf [file jamanetwopen-e2419696-s002.pdf]

## Data Sharing Statement

Hashemi. Gender-Affirming Hormone Treatment and Metabolic Syndrome Among Transgender Veterans. *JAMA Netw Open*. Published July 02, 2024.

doi:10.1001/jamanetworkopen.2024.19696

### Data

**Data available:** Yes

**Data types:** Deidentified participant data

**How to access data:** The datasheet will be shared upon request after obtaining permission from VHA,

**When available:** With publication

### Supporting Documents

**Document types:** Statistical/analytic code

**How to access documents:** The request can be sent to [lhshemi@mednet.ucla.edu](mailto:lhshemi@mednet.ucla.edu)

**When available:** With publication

### Additional Information

**Who can access the data:** researchers whose proposed use of the data has been approved

**Types of analyses:** for a specified purpose

**Mechanisms of data availability:** after approval of a proposal, or with a signed data access agreement).

**Any additional restrictions:** Obtaining data from VHA for non-VA employee is very hard and needs approval.
